# Supplementary material for: Endogenous formaldehyde scavenges cellular glutathione resulting in redox disruption and cytotoxicity
Source: PubMed Central journal article supplement (PMC8827065; doi:10.1038/s41467-022-28242-7), 2022-02-08
Supplement: 41467_2022_28242_MOESM1_ESM.pdf [file 41467_2022_28242_MOESM1_ESM.pdf]

**Endogenous formaldehyde scavenges cellular glutathione resulting in redox disruption and cytotoxicity**

Carla Umansky<sup>1,6</sup>, Agustín E. Morellato<sup>1,6</sup>, Matthias Rieckher<sup>2,6</sup>, Marco A. Scheidegger<sup>1</sup>, Manuela R. Martinefski<sup>3</sup>, Gabriela A. Fernandez<sup>3</sup>, Oleg Pak<sup>4</sup>, Ksenia Kolesnikova<sup>2</sup>, Hernán Reingruber<sup>1</sup>, Mariela Bollini<sup>3</sup>, Gerry P. Crossan<sup>5</sup>, Natascha Sommer<sup>4</sup>, María Eugenia Monge<sup>3</sup>, Björn Schumacher<sup>2</sup> and Lucas B. Pontel<sup>1,\*</sup>

Supplementary Fig. 1

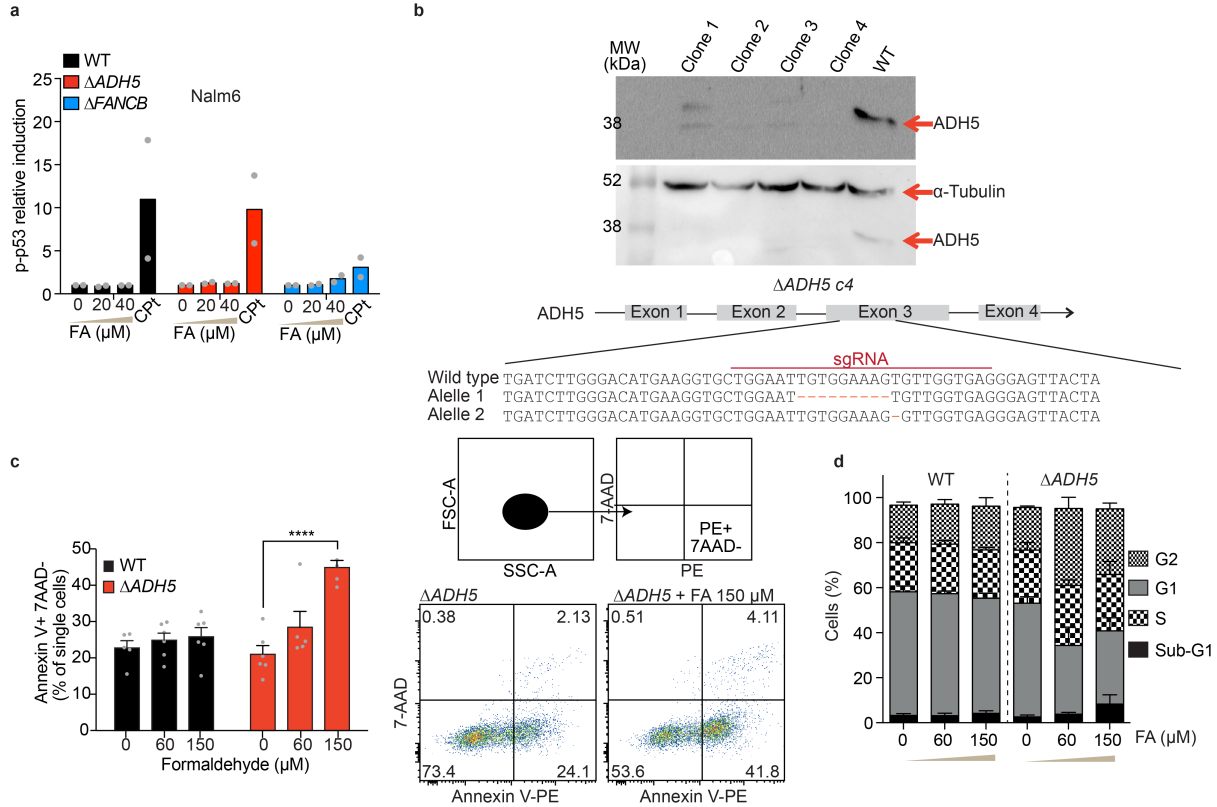

Supplementary Figure 1. **Formaldehyde is cytotoxic for  $\Delta ADH5$  cells.** **a** Quantification of p-p53 western blots shown in Fig. 1b using ImageJ ( $n=2$  biological independent samples, mean comparing against the same cell line untreated). WT: Wild type, FA: Formaldehyde, CPT: Cisplatin.  $\mu\text{M}$  refers to  $\mu\text{mol L}^{-1}$ . **b** Western blot analysis of ADH5 expression in clones edited by CRISPR/Cas9 in HCT116 (Top: ADH5; Bottom: same membrane stripped and blotted against  $\alpha$ -Tubulin). Bottom: ADH5 gene showing the exon targeted by CRISPR/Cas9 and the genetic modifications of the HCT116  $\Delta ADH5$  clone used in this work. **c** Quantification of apoptosis determined by Annexin V detection in WT and  $\Delta ADH5$  HCT116 cells exposed to FA over 24 h at the concentrations indicated in the figure ( $n=5$  biological independent samples, mean  $\pm$  SEM, two-tailed unpaired  $t$ -test, \*\*\*\* $P<0.0001$ ). Right: Representative flow cytometry plot for phosphatidylserine determination by Annexin V in  $\Delta ADH5$  HCT116 cells untreated or exposed to  $150 \mu\text{mol L}^{-1}$  FA (7-AAD: 7-amino-actinomycin D) and gating strategy (Top). **d** Cell cycle analysis of WT and  $\Delta ADH5$  HCT116 cells exposed to 60 and  $150 \mu\text{mol L}^{-1}$  FA over 24 h ( $n=4$ , mean  $\pm$  SEM).

Supplementary Fig. 2

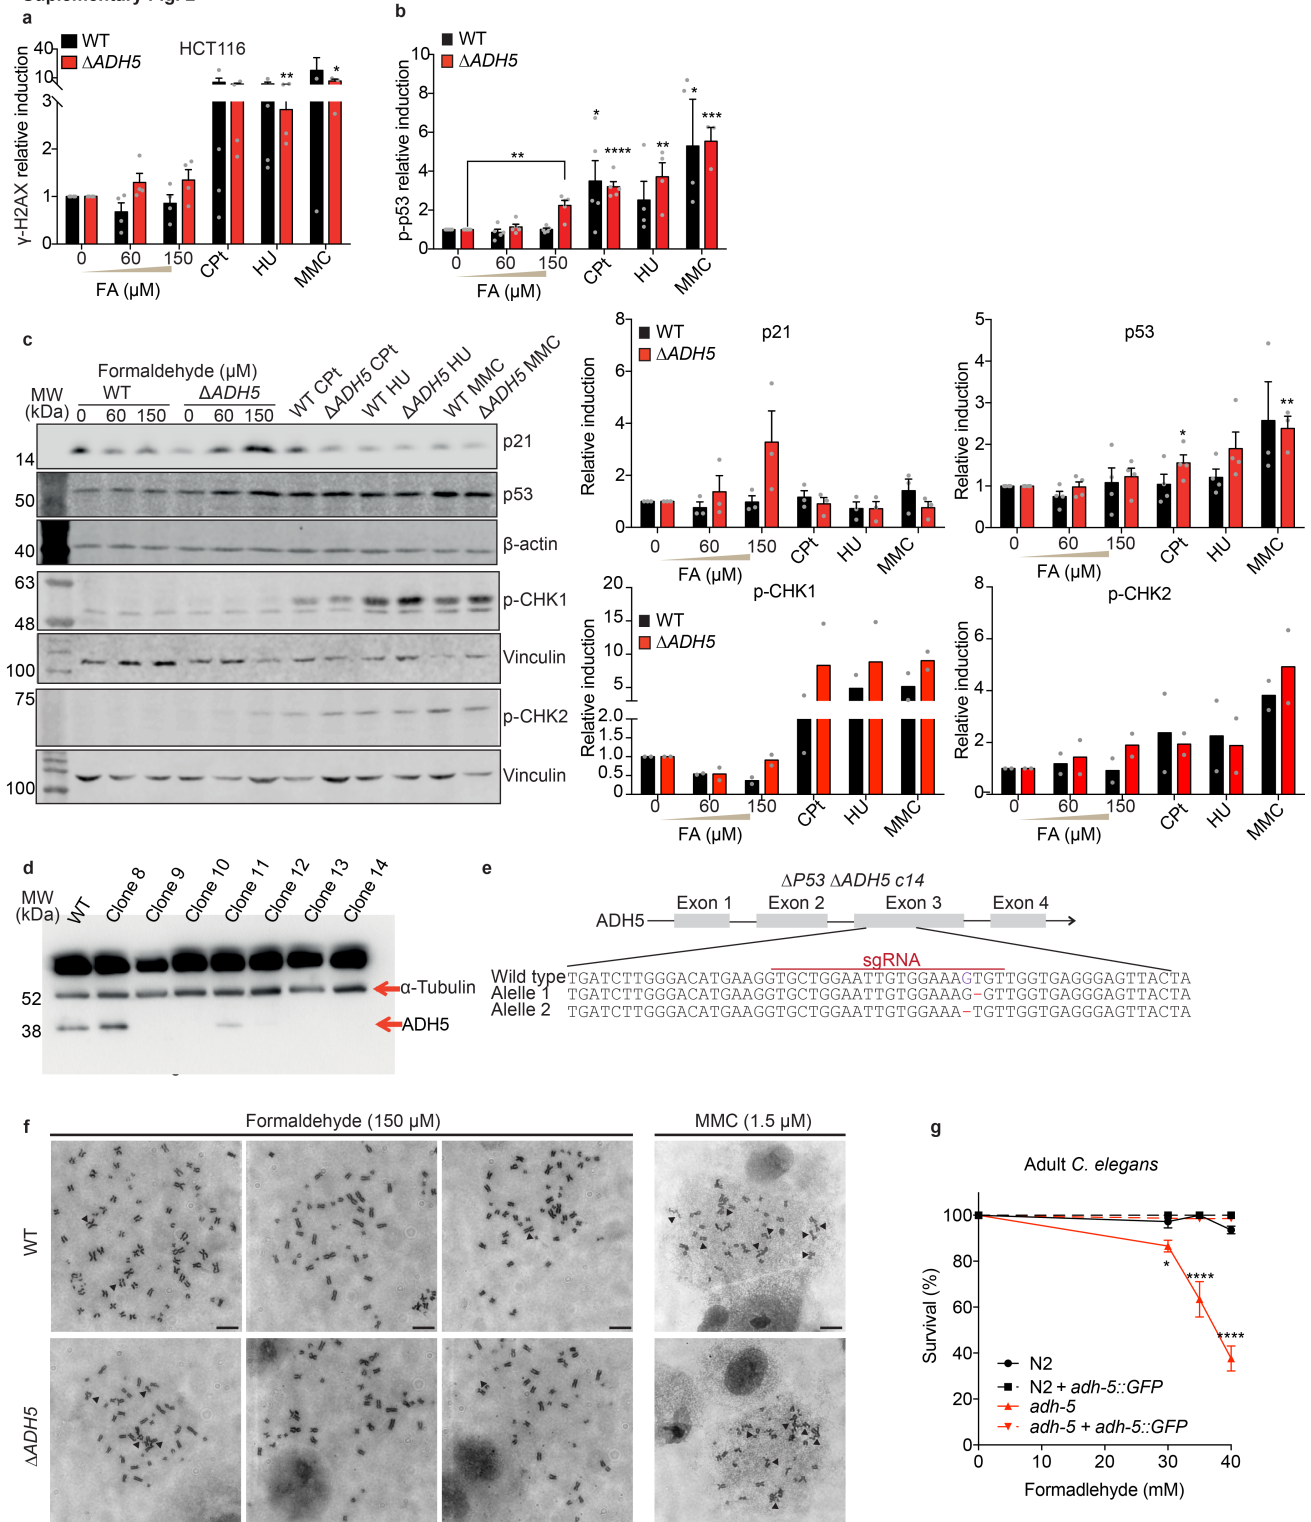

Supplementary Figure 2.  **$\Delta ADH5 \Delta TP53$  HCT116 cell line generation and DNA damage.** **a** Quantification of  $\gamma$ -H2AX western blots shown in fig. 1f (Formaldehyde (FA) 0, 60, 150, Cisplatin (CPT), and Hydroxyurea (HU)  $n=4$ ; Mitomycin C (MMC)  $n=3$ ; mean  $\pm$  SEM, two-tailed unpaired  $t$ -test comparing against same cell line untreated,  $**P=0.0025$  ( $\Delta ADH5$ , HU),  $*P=0.021$  ( $\Delta ADH5$ , MMC)). WT: Wild type. **b** Quantification of p-p53 western blots shown in fig. 1f (FA 0, 60, 150 and CPT  $n=5$ ; HU  $n=4$ , MMC  $n=3$ , two-tailed unpaired  $t$ -test comparing against same cell line untreated,  $**P=0.0014$  ( $\Delta ADH5$  vs  $\Delta ADH5$  150  $\mu\text{mol L}^{-1}$  FA),  $*P=0.045$  (WT, CPT),  $**P=0.0038$  ( $\Delta ADH5$ , HU),  $***P=0.0001$  ( $\Delta ADH5$ , MMC),  $*P=0.0496$  (WT, MMC),  $****P<0.0001$ ). **c** Western blots against

p21, p53, p-CHK1 and p-CHK2 with the corresponding loading controls in WT and  $\Delta ADH5$  HCT116 cells. p-CHK1 and the corresponding vinculin control were run on different gels. Uncropped images in Source Data File. Right: Quantification of western blots against p21 (n=3, mean  $\pm$  SEM, two-tailed unpaired *t*-test comparing against same cell line untreated) and p53 (n=4 all but MMC with n=3, mean  $\pm$  SEM, two-tailed unpaired *t*-test comparing against same cell line untreated, \**P*=0.0298 \*\**P*=0.0024); and p-CHK1 and p-CHK2 (mean, n=2). **d** Western blot analysis of ADH5 expression in HCT116  $\Delta TP53$  clones edited by CRISPR/Cas9. **e** ADH5 gene showing the exon targeted and the genetic modifications of the HCT116  $\Delta TP53 \Delta ADH5$  clone used in this work. **f** Representative images of metaphases generated with WT and  $\Delta ADH5$  HCT116 cells exposed to 150  $\mu\text{mol L}^{-1}$  FA or 1.5  $\mu\text{mol L}^{-1}$  MMC (scale bar 1  $\mu\text{m}$ ). **g** Survival of adult *C. elegans* expressing the transgene *adh-5::GFP* exposed to the indicated concentrations of FA for 4 h (n=3, mean  $\pm$  SEM, two-way ANOVA Bonferroni's multiple comparisons test, \**P*=0.0232, \*\*\*\**P*<0.0001 (*adh-5* vs N2, same FA concentration)).

Supplementary Fig. 3

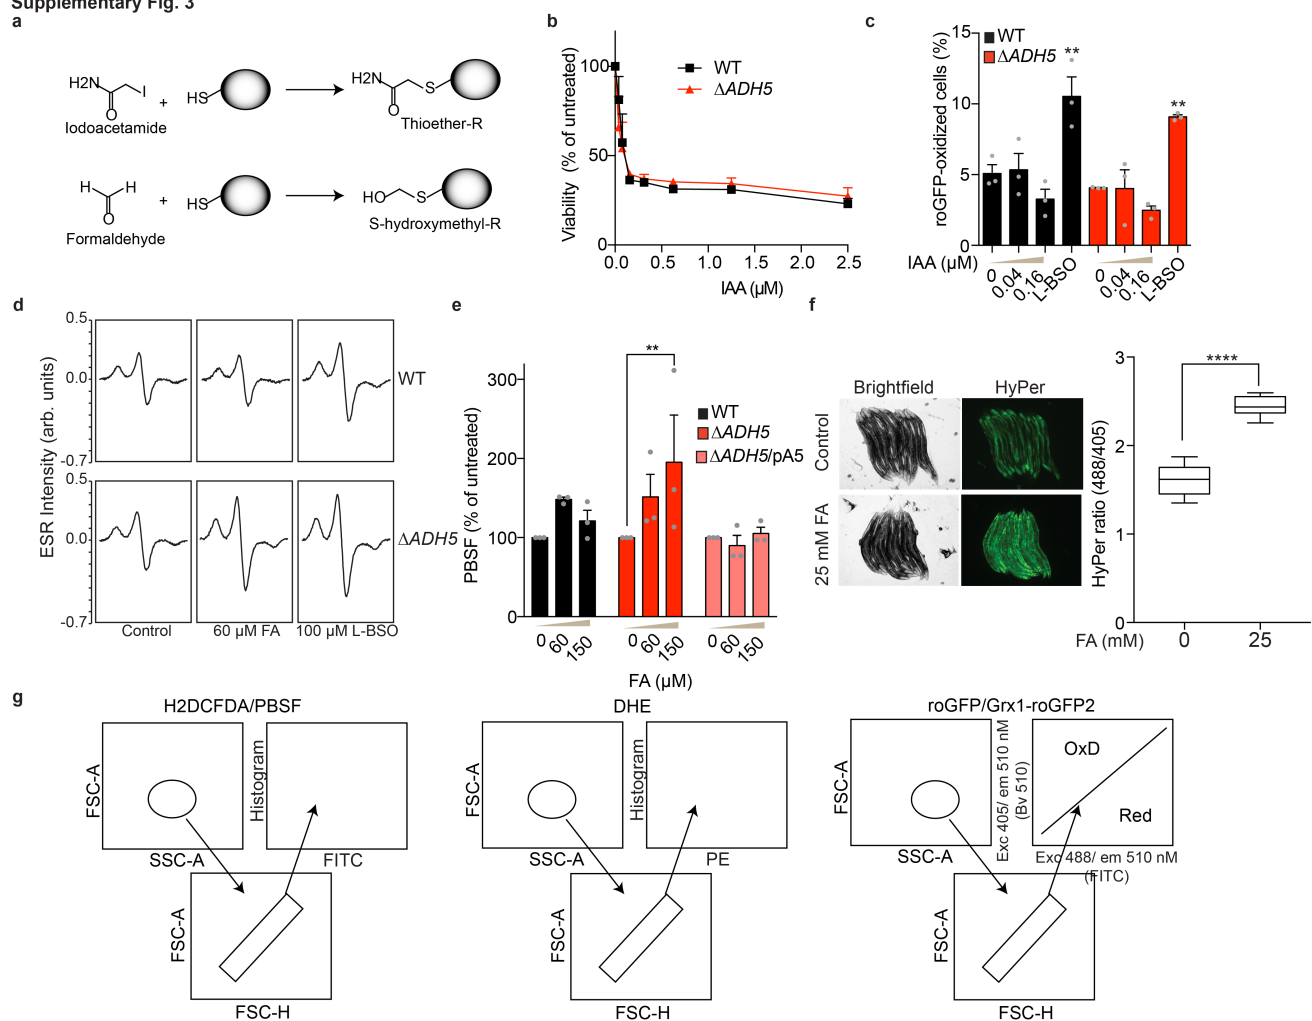

Supplementary Fig. 3. **Formaldehyde induces oxidative stress.** **a** Comparison of the reaction of iodoacetamide (IAA) with thiol groups (top) with the reaction of formaldehyde (FA) with thiol groups (bottom). **b** Viability assay in Wild type (WT) and  $\Delta ADH5$  HCT116 cells in presence of different concentrations of IAA. Viability was determined after five days relative to the corresponding untreated samples (n=3, mean  $\pm$  SEM).  $\mu\text{M}$  refers to  $\mu\text{mol L}^{-1}$ . **c** Plot depicting the percentage of WT and  $\Delta ADH5$  HCT116 cells harbouring the cytoplasmic-roGFP reporter that show oxidation after exposure to 0.04 and 0.16  $\mu\text{M}$  IAA for 48 h. L-buthionine sulfoximine (L-BSO) is shown as positive control (n=3, mean  $\pm$  SEM, two-way ANOVA corrected for Tukey's multiple



comparison  $**P=0.0046$  (WT),  $**P=0.0086$  ( $\Delta ADH5$ ). **d** Representative plots obtained from Electron Spin Resonance (ESR) spectroscopy in WT and  $\Delta ADH5$  HCT116 cells exposed to  $60 \mu\text{mol L}^{-1}$  FA or to  $100 \mu\text{mol L}^{-1}$  L-BSO for 48 h. **e** Cellular Peroxides determination by pentafluorobenzenesulfonyl fluorescein (PBSF) in Wild type (WT),  $\Delta ADH5$ , and complemented  $\Delta ADH5$  ( $\Delta ADH5/pA5$ ) HCT116 cells upon 48 h exposure to 0, 60 and  $150 \mu\text{mol L}^{-1}$  FA. Data is represented as the % of untreated from the same cell line ( $n=3$ , mean  $\pm$  SEM, two-way ANOVA, Tukey's multiple comparison test,  $**P=0.008$ ). mM refers to  $\text{mmol L}^{-1}$ . **f** Left, representative images of adult *C. elegans* expressing the H<sub>2</sub>O<sub>2</sub> sensor HyPer exposed to 0 or  $25 \text{mmol L}^{-1}$  FA for 5 h. Right, quantification of Hyper ratiometric response after excitation at 488 nm and 405 nm, denoting the induction of HyPer by  $25 \text{mmol L}^{-1}$  FA ( $n=10$ , box (line at median) and whiskers (min and max),  $****P<0.0001$ , unpaired non-parametric two-tailed Mann-Whitney test). **g** FACS gating approaches for H<sub>2</sub>DCFDA (Fig. 3b), PBSF (Sup. Fig 3e), DHE (Fig. 3c), roGFP (Fig. 3e) and Grx1-roGFP2 (Fig. 6i).

Supplementary Fig. 4

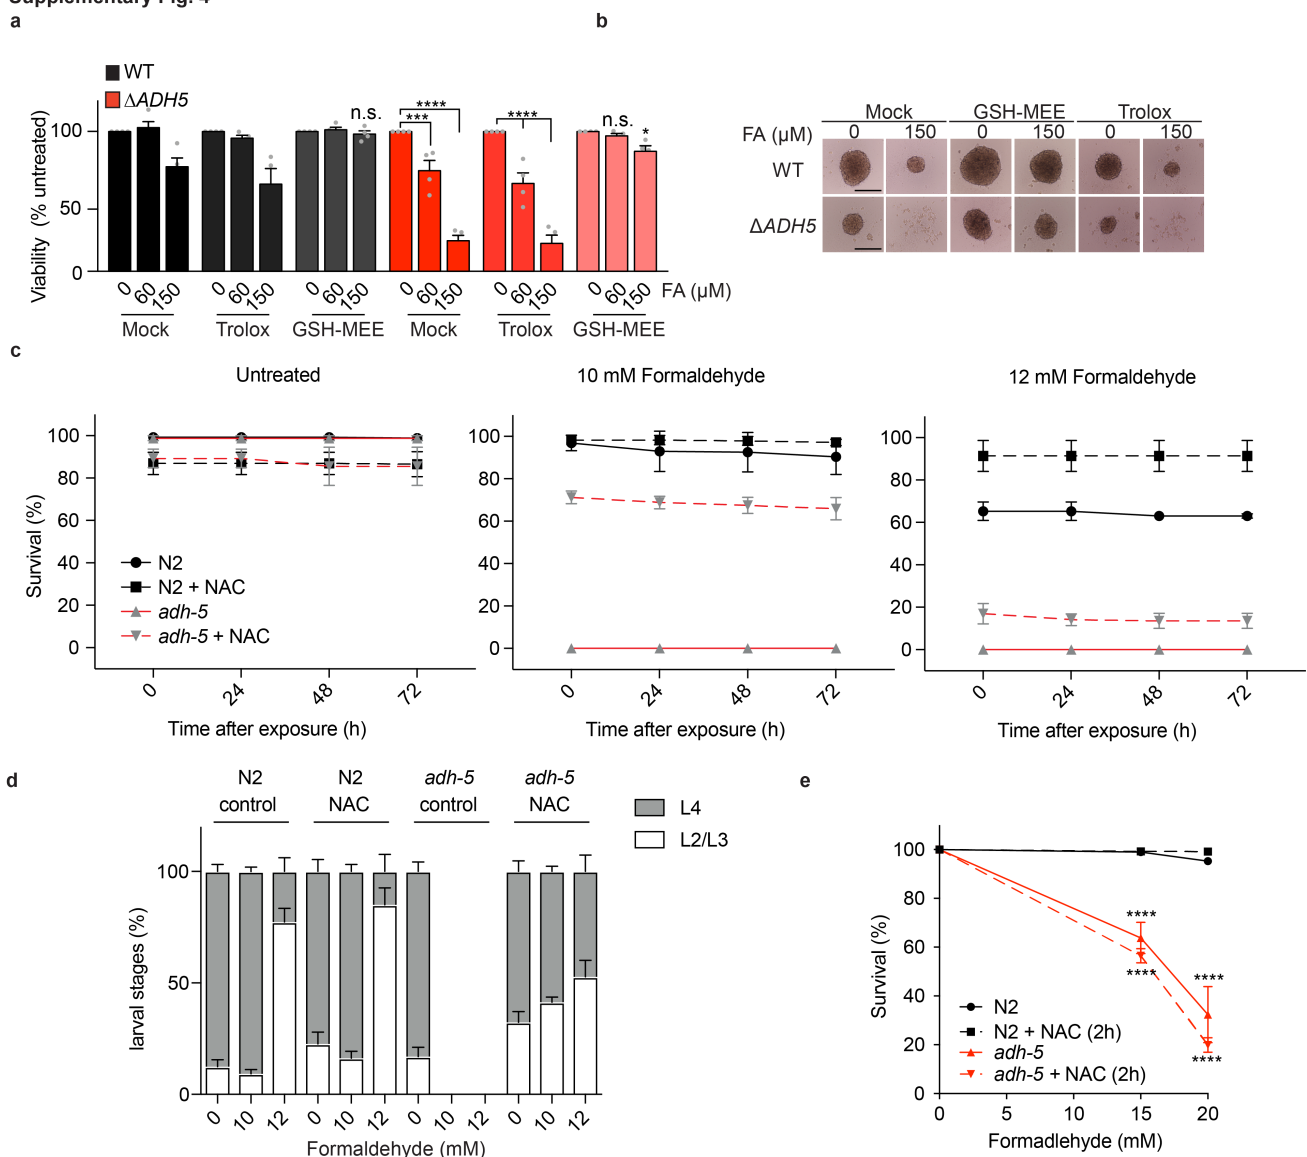

Supplementary Figure 4. **Formaldehyde cytotoxicity is prevented by thiol-containing antioxidants.** **a** Viability assays in presence of 60 or  $150 \mu\text{mol L}^{-1}$  formaldehyde (FA) and Trolox ( $1 \text{mmol L}^{-1}$ ) or glutathione monoethyl ester (GSH-MEE,  $1 \text{mmol L}^{-1}$ ). L-BSO was used at  $100 \mu\text{mol L}^{-1}$  in Wild type (WT) and  $\Delta ADH5$  HCT116 cells ( $n=4$ , mean  $\pm$  SEM; two-way ANOVA, Tukey multiple comparison test,  $***P=0.0002$ ,  $****P<0.0001$ ,  $*P=0.03$ , n.s. not

significant against same cell line untreated.  $\mu\text{M}$  refers to  $\mu\text{mol L}^{-1}$  and  $\text{mM}$  refers to  $\text{mmol L}^{-1}$ . **b** Extended data for the experiment shown in Fig. 4b. Representative images of sphere-formation assay carried out in presence of  $150 \mu\text{mol L}^{-1}$  FA and Trolox ( $1 \text{ mmol L}^{-1}$ ) or GSH-MEE ( $1 \text{ mmol L}^{-1}$ ). As reference, the pictures labelled as mock in this panel are the same as the ones included in the main Fig. 4b. **c** Survival of L1-staged Wild type (N2) and *adh-5* *C. elegans* mutant upon exposure to the indicated FA concentrations and  $10 \text{ mmol L}^{-1}$  N-acetyl-cysteine (NAC) measured 0, 24, 48 and 72 h after treatment ( $n=3$ , mean  $\pm$  SD). **d** Developmental stages of surviving animals 48 h after FA exposure ( $n=3$ , mean  $\pm$  SD). **e** Survival of adult N2 and *adh-5* *C. elegans* mutant pre-exposed for 2 h to  $10 \text{ mmol L}^{-1}$  NAC, washed off and then exposed to the indicated FA concentrations for 4 h ( $n=3$ , mean  $\pm$  SD, two-way ANOVA with Tukey comparison test against N2 same FA concentration \*\*\*\* $P<0.0001$ ). Survival was scored right after the FA treatment.

Supplementary Fig. 5

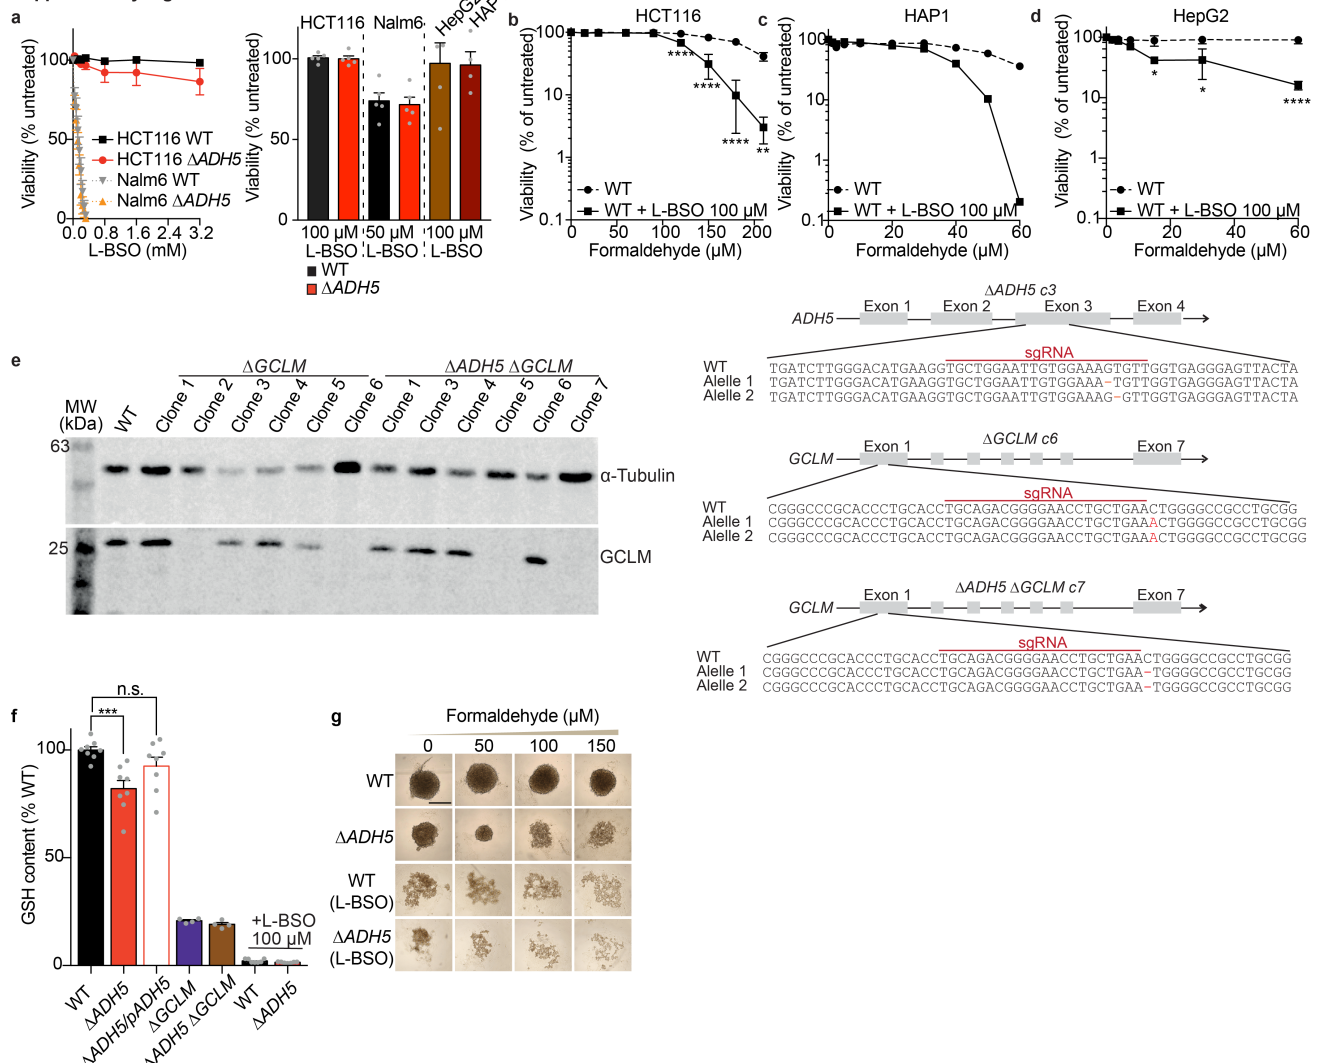

Supplementary Figure 5. **GSH biosynthesis inactivation.** **a** Viability assay for Wild type (WT) and  $\Delta ADH5$  HCT116 and Nalm6 cells in response to increasing concentrations of L-buthionine-sulfoximine (L-BSO) determined after three (HCT116,  $n=6$  (WT),  $n=3$  ( $\Delta ADH5$ ), mean  $\pm$  SEM) or five (Nalm6,  $n=6$ , mean  $\pm$  SEM) days.  $\mu\text{M}$  refers to  $\mu\text{mol L}^{-1}$ . Right: Viability assay for HCT116 and Nalm6 WT and  $\Delta ADH5$  cells at  $100$  and  $50 \mu\text{mol L}^{-1}$  L-BSO, respectively ( $n=5$ , mean  $\pm$  SEM); HepG2 ( $n=5$ , mean  $\pm$  SEM) and HAP1 ( $n=4$ , mean  $\pm$  SEM) cell lines at  $100 \mu\text{mol L}^{-1}$  L-BSO.

**b** Formaldehyde (FA) dose-response viability assay for HCT116 cells in presence of  $100 \mu\text{mol L}^{-1}$  L-BSO ( $n=5$ , mean, two-way ANOVA corrected for Bonferroni's multiple comparisons test).

\*\*\*\* $P < 0.0001$ , \* $P = 0.0033$ ). **c** Formaldehyde (FA) dose-response viability assay for HAP1 cells in presence of  $100 \mu\text{mol L}^{-1}$  L-BSO ( $n=2$ , mean). **d** FA dose-response MTS viability assay for HepG2 cells in presence of  $100 \mu\text{mol L}^{-1}$  L-BSO ( $n=3$ , mean  $\pm$  SEM, two-way ANOVA corrected for Bonferroni's multiple comparisons test \* $P = 0.0182$  ( $15 \mu\text{M}$  FA), \* $P = 0.011$  ( $30 \mu\text{M}$  FA), \*\*\*\* $P < 0.0001$ ). **e** Western blot analysis of *GCLM* expression in HCT116 clones edited by CRISPR/Cas9. Right: *ADH5* and *GCLM* genes showing the exon targeted by CRISPR/Cas9 and the genetic modifications detected. Bottom: *GCLM* gene showing the exon targeted by CRISPR/Cas9 and the genetic modifications of the HCT116  $\Delta GCLM$  clones used in this work. **f** Bar plot for GSH content in WT ( $n=8$ ),  $\Delta ADH5$  ( $n=8$ ),  $\Delta ADH5/pADH5$  ( $n=8$ ),  $\Delta GCLM$  ( $n=4$ ) and  $\Delta ADH5 \Delta GCLM$  ( $n=4$ ) cells, and in WT ( $n=7$ ) and  $\Delta ADH5$  ( $n=7$ ) HCT116 cells exposed to  $100 \mu\text{mol L}^{-1}$  L-BSO for 48 h. Every dot is the percentage of fluorescence intensity in a single well relative to the average fluorescence of WT samples run the same day and corrected for viability determined using resazurin (mean  $\pm$  SEM, one-way ANOVA with Tukey test for multiple comparisons, \*\*\*\* $P = 0.0001$ ). **g** 3D-spheroid formation in presence of  $100 \mu\text{mol L}^{-1}$  L-BSO and the indicated concentrations of FA in HCT116 cells. Pictures were taken 5 days after seeding cells on agarose-coated plates (scale bar 0.5 mm).

Supplementary Fig. 6

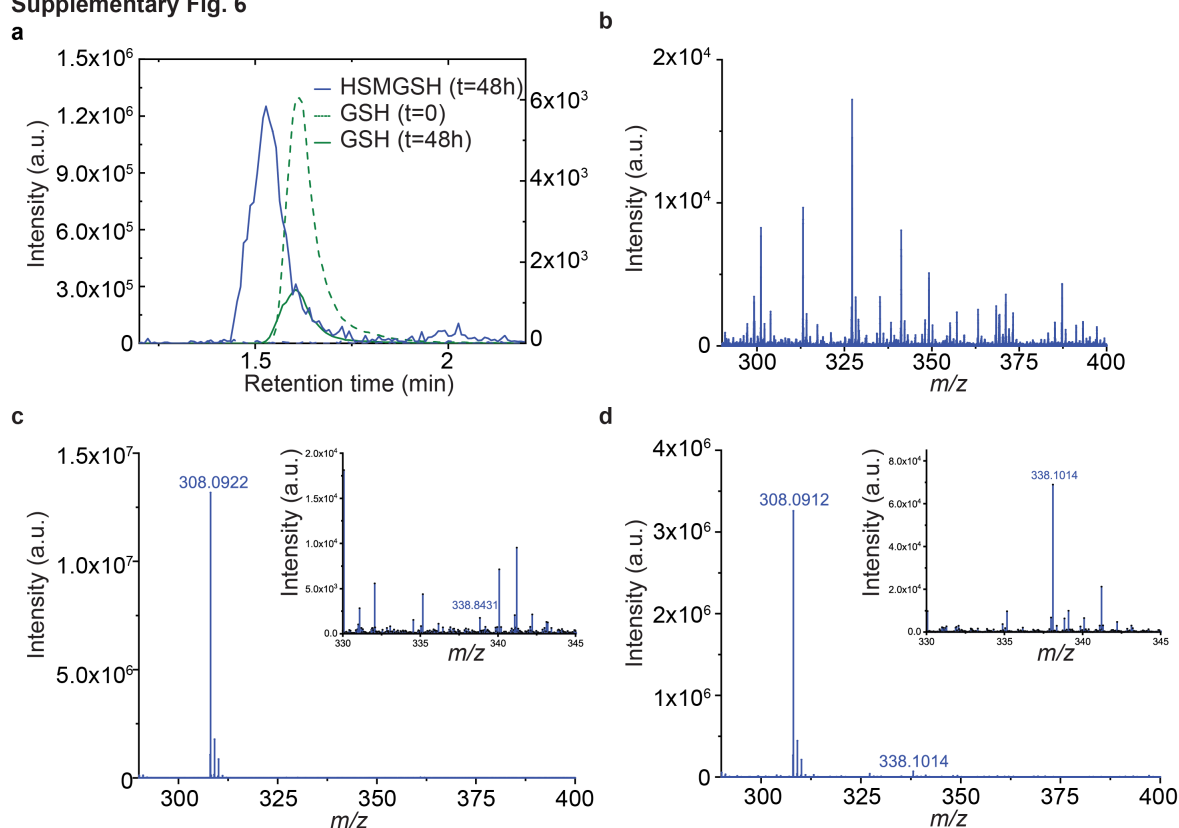

Supplementary Figure 6. **S-hydroxymethylglutathione synthesis.** **a** Extracted ion chromatograms for [glutathione (GSH) + H]<sup>+</sup> ion at  $m/z$  308.0916 generated from a  $10.4 \mu\text{mol L}^{-1}$  GSH standard solution before reaction ( $t_0$ : green dash line) and after 48 h of reaction ( $t_{48}$ : green solid line); and for [S-hydroxymethylglutathione (HSMGSH) + H]<sup>+</sup> ion at  $m/z$  338.1022 generated from a  $10.4 \mu\text{mol L}^{-1}$  GSH standard solution before reaction ( $t_0$ : blue dash line) and after 48 h reaction ( $t_{48}$ : blue solid line). **b** Mass spectrum for the solvent at  $t_0$ , with no signals detected at  $m/z$  308.0916 or  $m/z$  338.1022. **c** Mass spectrum for a GSH standard solution at  $t_0$ , with no signal detected at  $m/z$  338.1022. **d** Mass spectrum for the reaction mixture at  $t_{48}$ .

Supplementary Fig. 7

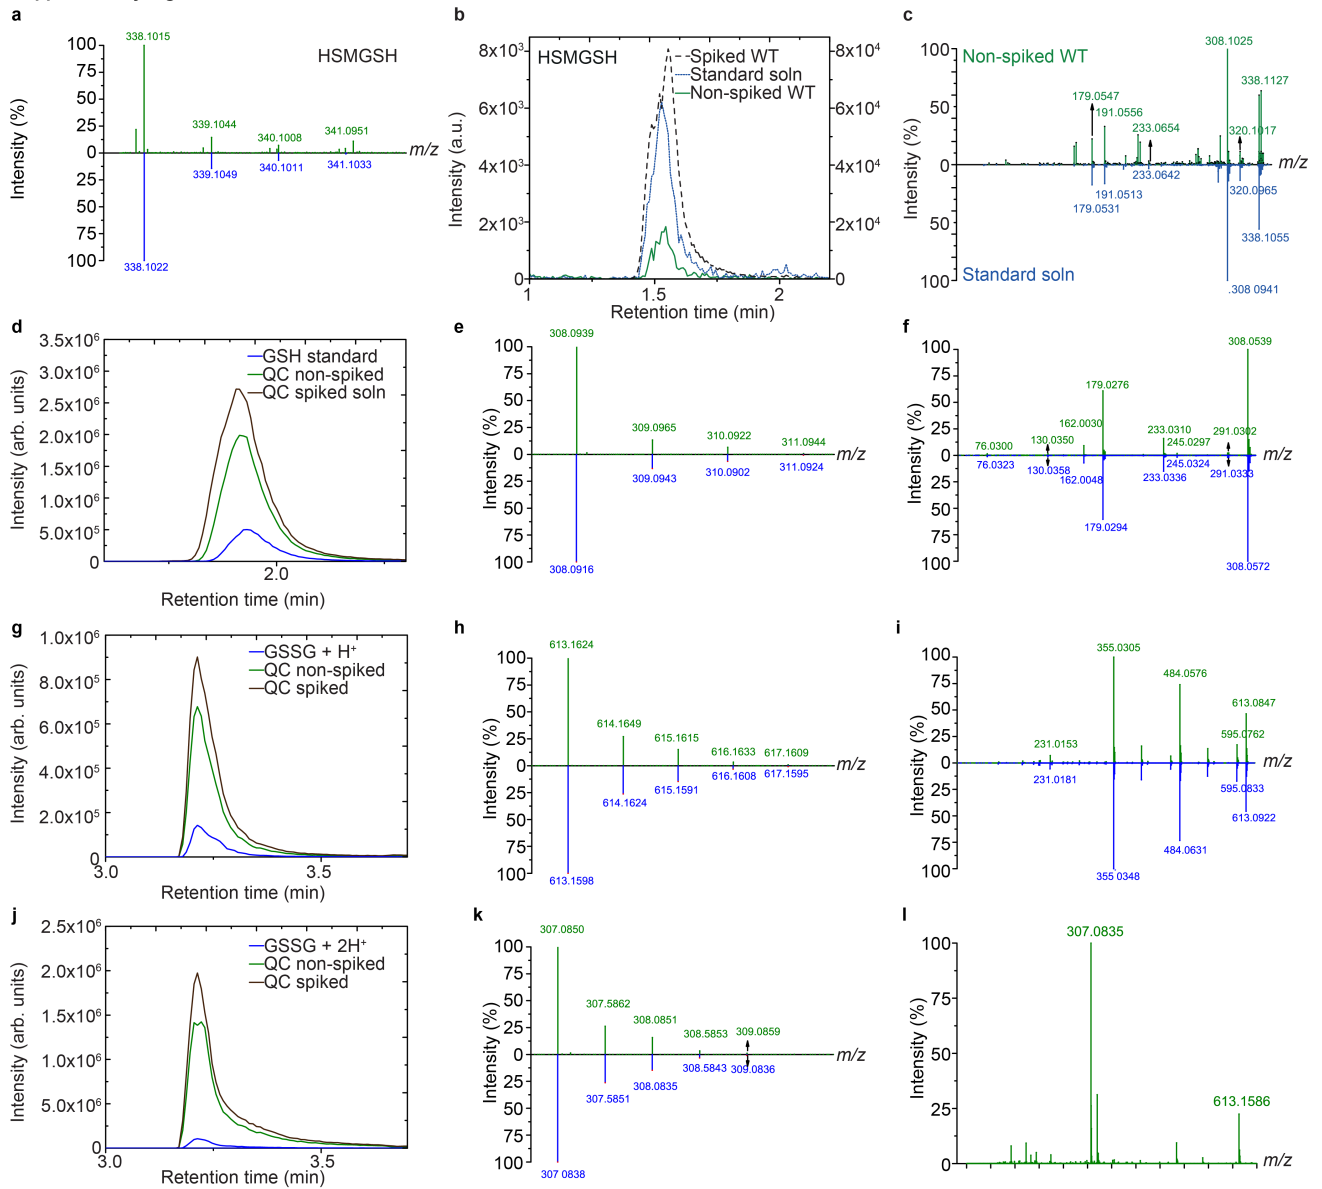

**Supplementary Fig. 7: detection of S-hydroxymethylglutathione in cells.**

**a.** Mass spectrum for [S-hydroxymethylglutathione (HSMGSH) + H]<sup>+</sup> ion at  $m/z$  338.1022 in a Wild type (WT) sample (green), and its simulated isotopic pattern (blue). **b.** Extracted ion chromatograms for [HSMGSH + H]<sup>+</sup> ion at  $m/z$  338.1022 ± 0.0500. Non-spiked WT sample (green, left axis), 20 μmol L<sup>-1</sup> spiked WT (black dotted line, right axis), and 20 μmol L<sup>-1</sup> HSMGSH standard solution (blue, left axis). **c.** Product ion mass spectra of [HSMGSH + H]<sup>+</sup> precursor ion. WT (green) and a 20 μmol L<sup>-1</sup> HSMGSH standard solution (blue), using a collision cell voltage of 10 V. **d.** Extracted ion chromatograms for [GSH + H]<sup>+</sup> ion at  $m/z$  308.0916 ± 0.0500. Non-spiked QC sample (green), 43 μmol L<sup>-1</sup> spiked QC sample (brown), and 14.3 μmol L<sup>-1</sup> GSH standard solution (blue). **e.** Mass spectrum for [GSH + H]<sup>+</sup> ion at  $m/z$  308.0916. QC sample (green), and its simulated isotopic pattern (blue). **f.** Product ion mass spectrum for [GSH + H]<sup>+</sup> precursor ion. QC sample (green) and 14.3 μmol L<sup>-1</sup> GSH standard solution (blue), using a collision cell voltage of 10 V. **g.** Extracted ion chromatograms for [GSH disulfide (GSSG) + H]<sup>+</sup> ion at  $m/z$  613.1598 ± 0.0500. Non-spiked QC sample (green), 15.5 μmol L<sup>-1</sup> spiked QC sample (brown), and 15.5 μmol L<sup>-1</sup> GSSG standard (blue). **h.** Mass spectrum for [GSSG + H]<sup>+</sup> ion at  $m/z$

613.1598. QC sample (green), and its simulated isotopic pattern (blue). **i.** Product ion mass spectrum for [GSSG + H]<sup>+</sup> precursor ion. QC sample (green), and a 15.5 μmol L<sup>-1</sup> GSSG standard solution (blue) using a collision cell voltage of 20 V.
